# Supplementary material for: Comparing Aerodynamic Efficiency in Birds and Bats Suggests Better Flight Performance in Birds
Source: PLoS One. 2012 May 18;7(5):e37335. doi: 10.1371/journal.pone.0037335 (PMC3356262; doi:10.1371/journal.pone.0037335)
Supplement: Table S2 — Statistical results for the mixed linear model analysis of normalized lift and thrust production during the upstroke ( L/W up and T/W up, respectively). Variables are the degrees-of-freedom (DoF), F-ratio, the r2-value, t-ratio, and p-values. The p-values in bold are significant. (DOC) [file pone.0037335.s010.doc]

**Table S2 statistical results for the mixed linear model analysis of normalized lift and thrust production during the upstroke (*L/W*up and *T/W*up, respectively). Variables are the degrees-of-freedom (*DoF*), *F*-ratio, the *r2*-value, *t*-ratio, and *p*-values. The *p*-values in bold are significant.**

|  |  | L/Wup |  |  | T/Wup |  |
| --- | --- | --- | --- | --- | --- | --- |
|  | DF | F-ratio | r2 | DF | F-ratio | r2 |
| Overall Model | 5 | 11.56 | 0.7940 | 5 | 44.72 | 0.9371 |
|  |  |  |  |  |  |  |
|  | DF | t-ratio | p-value | DF | t-ratio | p-value |
| Intercept | - | 9.61 | **<0.0001** | - | 12.30 | **<0.0001** |
| Bird/Bat | 1 | 0.38 | 0.7079 | 1 | -0.72 | 0.4834 |
| U | 1 | -3.66 | **0.0023** | 1 | -10.62 | **<0.0001** |
| U x Bird/Bat | 1 | -4.85 | **0.0002** | 1 | -6.47 | **<0.0001** |
